# Supplementary material for: One dimensional molecular dipole chain arrays on graphitevia nanoscale phase separation
Source: Royal Society of Chemistry journal article supplement (doi:10.1039/c0cc03251d), 2010-01-01
Supplement: c0cc03251d.pdf [file c0cc03251d.pdf]

## Supplementary Information

### One Dimensional Molecular Dipole Chain Arrays on Graphite via Nanoscale Phase Separation

Yu Li Huang,<sup>a</sup> Rui Wang,<sup>a</sup> Tian Chao Niu,<sup>b</sup> Satoshi Kera,<sup>c</sup> Nobuo Ueno,<sup>c</sup> Jens Pflaum,<sup>d</sup> Andrew Thye  
Shen Wee<sup>a</sup>, Wei Chen,<sup>\*a,b</sup>

<sup>a</sup> *Department of Physics, National University of Singapore, 2 Science Drive 3, 117542, Singapore.*

<sup>b</sup> *Department of Chemistry, National University of Singapore, 3 Science Drive 3, 117543, Singapore.*

<sup>c</sup> *Graduate School of Advanced Integration Science, Chiba University, 1-33 Yayoi-cho, Inage-ku,  
Chiba 263-8522, Japan*

<sup>d</sup> *Institute of Experimental Physics VI, University of Wuerzburg, Wuerzburg (Germany); Bavarian  
Center for Applied Energy Research, Am Hubland, 97047 Wuerzburg (Germany).*

\*E-mail: [phycw@nus.edu.sg](mailto:phycw@nus.edu.sg) Fax: +65-67776126; +65-65162921

## 1. Large-scale STM images of 0.8 ML CIAIPc on HOPG

Our CIAIPc films were prepared by deposition of CIAIPc on graphite surface at room temperature without further annealing. In this case, before the HOPG surface is fully covered, CIAIPc molecules can aggregate into either single-layer or bi-layer islands with irregular shapes on the graphite terraces.

As shown in Figure S1, the HOPG surface is covered with 0.8 ML CIAIPc. Figure S1(a) ( $150 \times 150 \text{ nm}^2$ ) shows the formation of a single-layer CIAIPc island (right) with irregular edge (white dashed line) and the coexistence of HOPG surface with diffused molecules (left, loosely packed CIAIPc layer). Figure S1 (b) ( $50 \times 50 \text{ nm}^2$ ) demonstrates a single-layer + bi-layer island, where the HOPG surface with diffused molecules (loosely packed CIAIPc layer) can also be observed at the left side of the image.

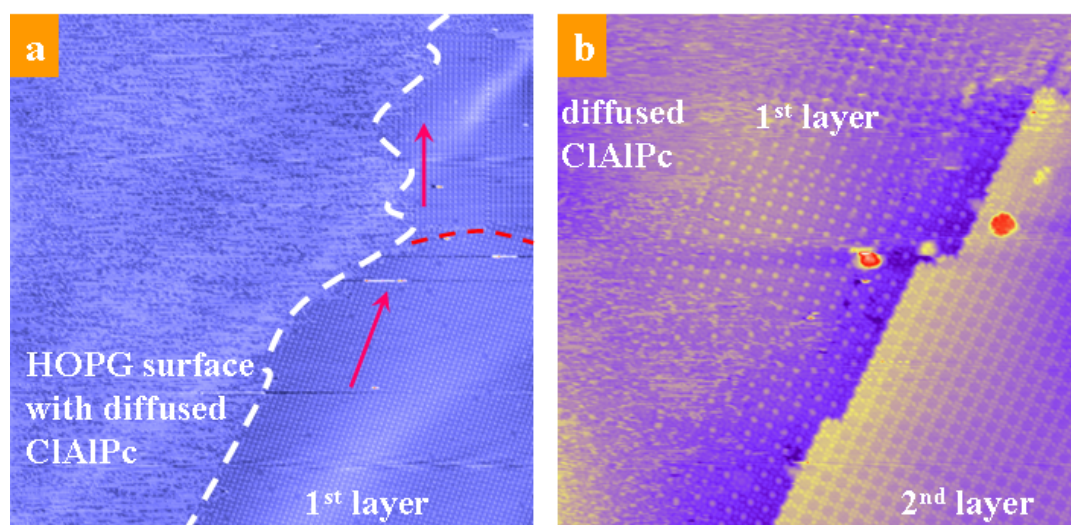

**Figure S1** Large-scaled STM images demonstrate the formation of the single-layer + bi-layer CIAIPc film at 0.8 ML coverage. (a)  $150 \times 150 \text{ nm}^2$ ,  $V_{\text{tip}} = 2.4 \text{ V}$ ; and (b)  $50 \times 50 \text{ nm}^2$ ,  $V_{\text{tip}} = 2.6 \text{ V}$ . In panel a, the red arrows denote two different molecular domains with different molecular stripe orientations (top and bottom) in the single-layer island.

## 2. Detailed analyses of the supramolecular packing structure of the bi-layer CIAIPc film

We suggest that the 1<sup>st</sup> layer CIAIPc molecules on HOPG adopt Cl-up configuration and the 2<sup>nd</sup> layer molecules adopt Cl-down configuration based on following justifications:

As shown in figure S2(a), our STM image apparently reveals different molecular features for the 1<sup>st</sup> layer CIAIPc molecule and the 2<sup>nd</sup> layer one on HOPG, that is, a four-lobe feature with a bright central protrusion for the 1<sup>st</sup> layer and with a central depression for the 2<sup>nd</sup> layer. As revealed in the lateral profile of Figure S2(b), the protrusion is of  $\sim 1 \text{ \AA}$  higher than its sounding lobes and the depression is of  $\sim 0.6 \text{ \AA}$  lower than its lobes under the same scanning conditions. We intuitively assign the 1<sup>st</sup> layer molecule with a bright central protrusion to the one with the Cl-up configuration and the 2<sup>nd</sup> layer molecule with a central depression to the one with the Cl-down configuration. The 1<sup>st</sup> monolayer CIAIPc adopting the Cl-up configuration on the graphite surface can maximize the interfacial  $\pi$ - $\pi$  interaction between the molecule and substrate. Through close inspections of the edges of the bi-layer islands, we found that the 2<sup>nd</sup> layer CIAIPc molecules adsorb on the 4-fold hollow site of the 1<sup>st</sup> layer of CIAIPc (as shown in Figure S2(d)). Such packing structure of the bilayer film can

enhance the electrostatic interaction between dipolar CIAIPc molecules with opposite dipole orientations.

Our assignments of the molecular orientation of the 1<sup>st</sup> and 2<sup>nd</sup> layer CIAIPc on HOPG is consistent with previous observations by metastable atom electron spectroscopy and ultra-violet photoemission (UPS) study for CIAIPc on HOPG.<sup>1</sup> Similar stacking configurations have been also widely observed in other dipole and non-planar phthalocyanine thin films, such as OTiPc on HOPG,<sup>2</sup> SnPc on Ag(111),<sup>3</sup> CIAIPc on MoS<sub>2</sub><sup>4</sup> and so on.

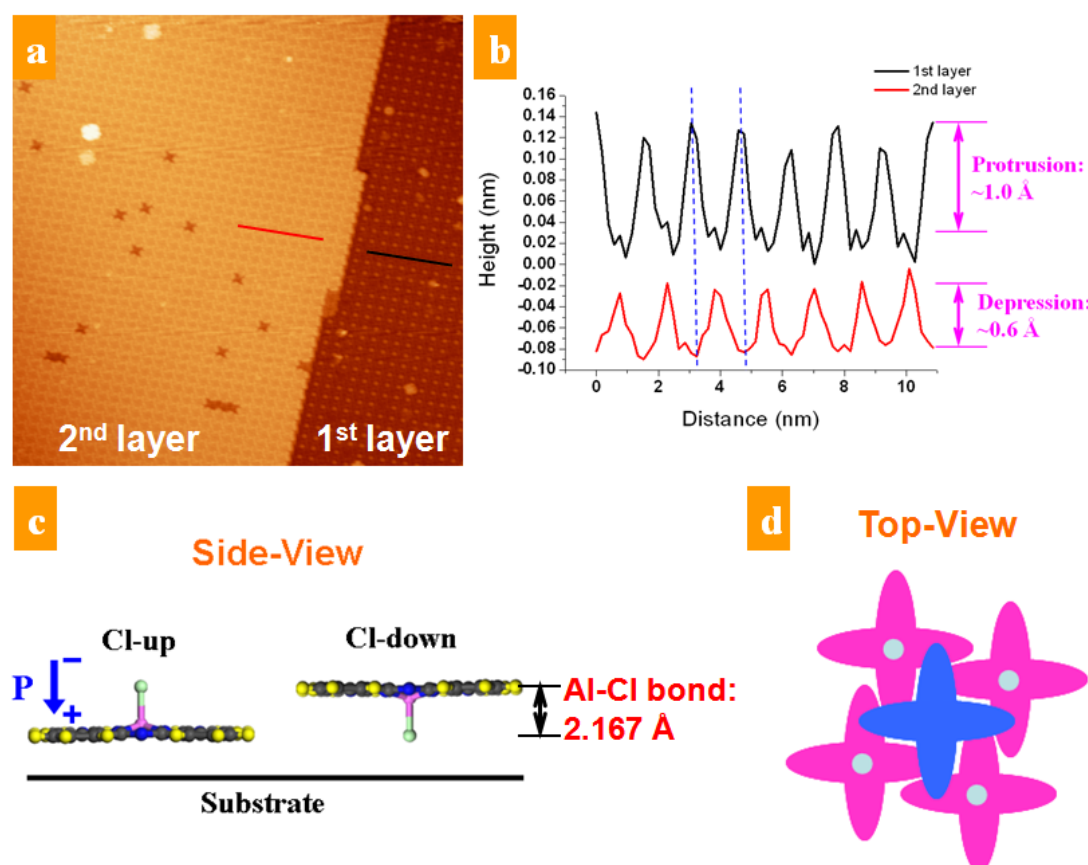

**Figure S2** (a) The formation of the single-layer + bi-layer CIAIPc film ( $60 \times 60 \text{ nm}^2$ ,  $V_{\text{tip}} = 2.8 \text{ V}$ ). (b) The lateral profiles corresponding to the black and red lines in panel (a), reveal a  $1.0 \text{ \AA}$  protrusion for the 1<sup>st</sup> layer CIAIPc molecule and a  $0.6 \text{ \AA}$  depression for the 2<sup>nd</sup> layer one. The blue dashed lines indicate the positions of the molecular centers of the 1<sup>st</sup> and 2<sup>nd</sup> layer CIAIPc molecules. (c) Side views of CIAIPc molecules adsorbed on a substrate with Cl-up and Cl-down configurations respectively. (d) Proposed stacking structure of the CIAIPc bi-layer film, where the purple molecules represent the 1<sup>st</sup> layer molecules with Cl-up configuration and the blue one represents the 2<sup>nd</sup> layer molecule with Cl-down configuration.

### 3. Defects in the 1<sup>st</sup> monolayer of CIAIPc on HOPG

In the 1<sup>st</sup> monolayer, most of the CIAIPc molecules adopt the Cl-up configuration and appear as four-lobe features with central protrusion. There are two kinds of defects observed in the 1<sup>st</sup> monolayer as shown in the high-resolution STM image of Figure S3. The molecule with brighter contrast compared to its surrounding molecules at both positive (indicated by purple arrows) and negative tip

bias is suggested to be a CIAIPc molecule with Cl-down configuration in the 1<sup>st</sup> layer. The molecule with dimmer contrast (denoted by green arrows) is attributed to an impurity from the CIAIPc molecular source. One possible impurity source is H<sub>2</sub>Pc without the central ClAl compound.

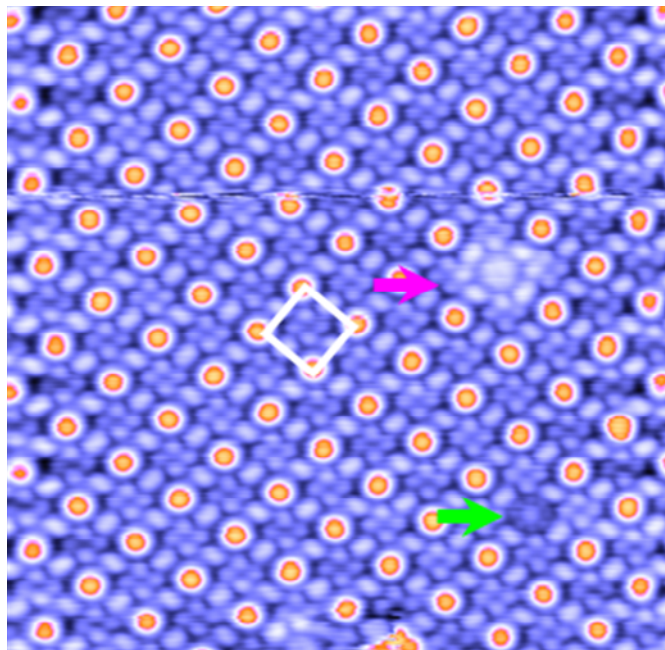

**Figure S3** High-resolution STM image shows the single-layer CIAIPc film on HOPG ( $15 \times 15 \text{ nm}^2$ ,  $V_{\text{tip}} = 2.4 \text{ V}$ ), where the purple arrow indicates a Cl-down CIAIPc molecule and the green one refers to an impurity.

#### References:

1. S. Kera, H. Yamane, H. Honda, H. Fukagawa, K. K. Okudaira and N. Ueno, *Surf. Sci.*, 2004, **566-568**, 571.
2. H. Fukagawa, H. Yamane, S. Kera, K. K. Okudaira and N. Ueno, *Phys. Rev. B*, 2006, **73**, 041302.
3. Y. Wang, J. Kröger, R. Berndt and W. Hofer, *Angew. Chem. Int. Ed.*, 2009, **48**, 1261.
4. Y. Azuma, T. Yokota, S. Kera, M Aoki, K. K. Okudaira, Y. Harada, and N. Ueno, *Thin Solid Films*, 1998, **327-329**, 303.
